# Supplementary material for: Autocrine and paracrine STIP1 signaling promote osteolytic bone metastasis in renal cell carcinoma
Source: PubMed Central journal article supplement (PMC5370018; doi:10.18632/oncotarget.15222), 2017-02-09
Supplement: oncotarget-08-17012-s001.pdf [file oncotarget-08-17012-s001.pdf]

# Autocrine and paracrine STIP1 signaling promote osteolytic bone metastasis in renal cell carcinoma

## Supplementary Materials

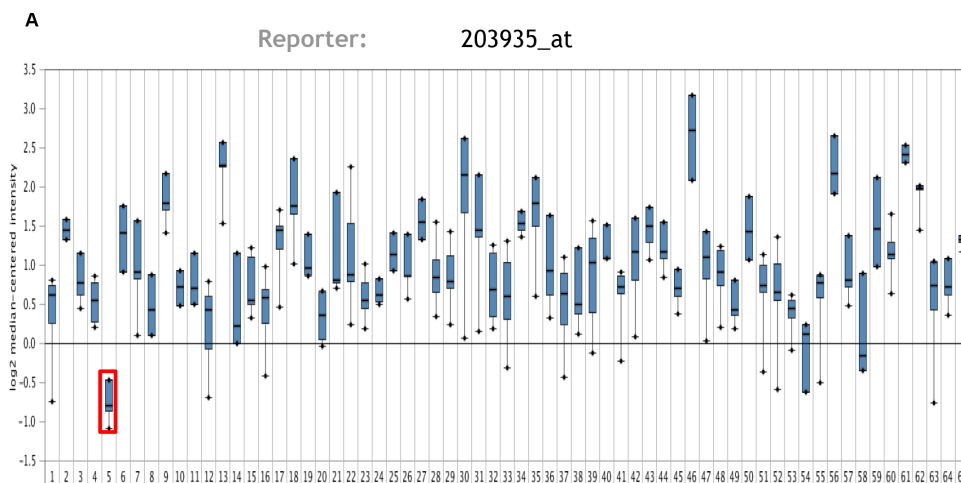

**Legend**

1. Accumbens Nucleus (9)
2. Adipose Tissue (3)
3. Adrenal Cortex (4)
4. Amygdala (8)
5. **Bone Marrow (5)**
6. Bronchus (3)
7. Buccal Mucosa (4)
8. Gastric Cardia (3)
9. Cardiac Atrium (4)
10. Cardiac Ventricle (3)
11. Cecum (3)
12. Cerebellum (9)
13. Cervix Uteri (4)
14. Coronary Artery (3)
15. Corpus Callosum (9)
16. Cerebral Cortex (9)
17. Dorsal Root Ganglion (8)
18. Endometrium (4)
19. Esophagus (4)
20. Frontal Lobe (9)
21. Fundus of the Stomach (4)
22. Hippocampus (9)
23. Hypothalamus (8)
24. Liver (4)
25. Lung (3)
26. Lymph Node (4)
27. Mammary Gland (3)
28. Medulla Oblongata (9)
29. Mesencephalon (9)
30. Myometrium (5)
31. Nipple (4)
32. Nodose Ganglion (8)
33. Occipital Lobe (8)
34. Omental Adipose Tissue (4)
35. Ovary (4)
36. Papilla of the Tongue (4)
37. Parietal Lobe (9)
38. Pharyngeal Mucosa (4)
39. Pituitary Gland (8)
40. Prostate Gland (3)
41. Putamen (9)
42. Pylorus (4)
43. Renal Cortex (4)
44. Renal Medulla (4)
45. Salivary Gland (4)
46. Saphenous Vein (3)
47. Skeletal Muscle Tissue (5)
48. Spinal Cord (8)
49. Spleen (4)
50. Subcutaneous Adipose Tissue (3)
51. Substantia Nigra (8)
52. Subthalamic Nucleus (8)
53. Temporal Lobe (8)
54. Testis (3)
55. Thalamus (8)
56. Thyroid Gland (4)
57. Tongue (4)
58. Tonsil (3)
59. Trachea (3)
60. Trigeminal Ganglion (8)
61. Urethra (3)
62. Vagina (4)
63. Ventral Tegmentum (8)
64. Vestibular Nucleus (7)
65. Vulva (4)

**Roth Normal**

Neurogenetics 353 samples  
 2006/05/01  
 mRNA 19,574 measured genes  
 Human Genome U133 Plus 2.0 Array

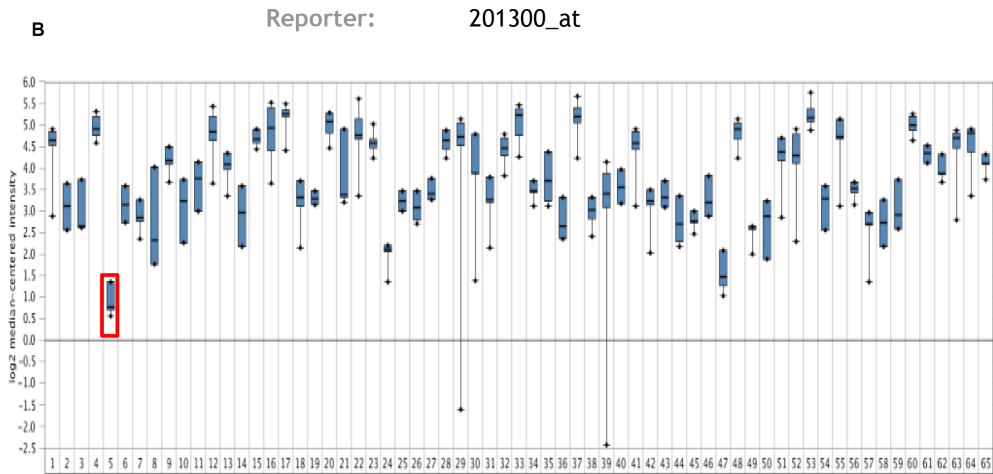

**Legend**

1. Accumbens Nucleus (9)
2. Adipose Tissue (3)
3. Adrenal Cortex (4)
4. Amygdala (8)
5. Bone Marrow (5)
6. Bronchus (3)
7. Buccal Mucosa (4)
8. Gastric Cardia (3)
9. Cardiac Atrium (4)
10. Cardiac Ventricle (3)
11. Cecum (3)
12. Cerebellum (9)
13. Cervix Uteri (4)
14. Coronary Artery (3)
15. Corpus Callosum (9)
16. Cerebral Cortex (9)
17. Dorsal Root Ganglion (8)
18. Endometrium (4)
19. Esophagus (4)
20. Frontal Lobe (9)
21. Fundus of the Stomach (4)
22. Hippocampus (9)
23. Hypothalamus (8)
24. Liver (4)
25. Lung (3)
26. Lymph Node (4)
27. Mammary Gland (3)
28. Medulla Oblongata (9)
29. Mesencephalon (9)
30. Myometrium (5)
31. Nipple (4)
32. Nodose Ganglion (8)
33. Occipital Lobe (8)
34. Omental Adipose Tissue (4)
35. Ovary (4)
36. Papilla of the Tongue (4)
37. Parietal Lobe (9)
38. Pharyngeal Mucosa (4)
39. Pituitary Gland (8)
40. Prostate Gland (3)
41. Putamen (9)
42. Pylorus (4)
43. Renal Cortex (4)
44. Renal Medulla (4)
45. Salivary Gland (4)
46. Saphenous Vein (3)
47. Skeletal Muscle Tissue (5)
48. Spinal Cord (8)
49. Spleen (4)
50. Subcutaneous Adipose Tissue (3)
51. Substantia Nigra (8)
52. Subthalamic Nucleus (8)
53. Temporal Lobe (8)
54. Testis (3)
55. Thalamus (8)
56. Thyroid Gland (4)
57. Tongue (4)
58. Tonsil (3)
59. Trachea (3)
60. Trigeminal Ganglion (8)
61. Urethra (3)
62. Vagina (4)
63. Ventral Tegmentum (8)
64. Vestibular Nucleus (7)
65. Vulva (4)

**Roth Normal**

Neurogenetics 353 samples  
2006/05/01  
mRNA 19,574 measured genes  
Human Genome U133 Plus 2.0 Array

**Supplementary Figure 1:** Oncomine database analysis of ALK2 (A) and PrPc (B) mRNA expression in normal human tissue (Neurogenetics 2006 7:67–80).

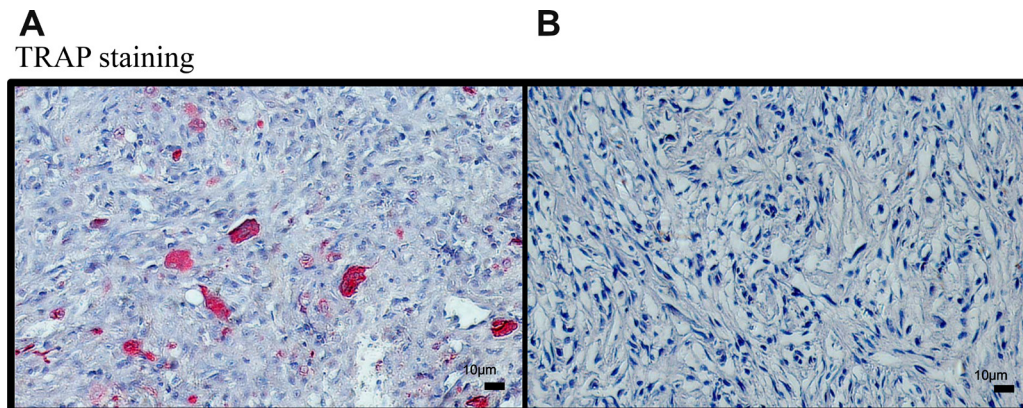

**Supplementary Figure 2:** TRAP staining in OS-RC-2-BM5 (A) and non-tumor area (B). A: trap staining in bone lesion from mouse model with OS-RC-2-BM5 B trap staining in peritumorous connective tissue from mouse model.
